# Supplementary material
Source: PubMed Central journal article supplement (PMC4156721)
Supplement: 1406908111_pnas.201406908SI.pdf [file 1406908111_pnas.201406908SI.pdf]

# Supporting Information

von Burg et al. 10.1073/pnas.1406908111

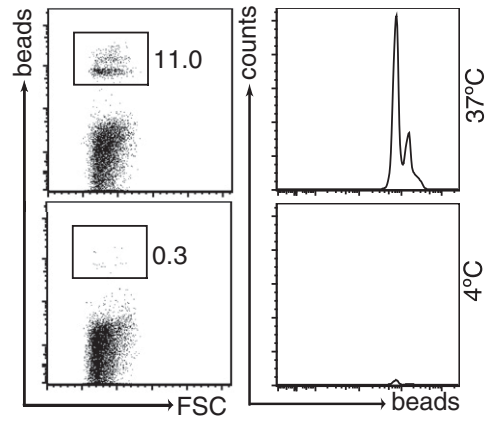

Fig. S1. Sort-purified ex vivo-isolated splenic NCR<sup>-</sup> group 3 innate lymphoid cells (ILC3s) incubated for 6 h with red fluorescent latex beads at 37 °C or 4 °C.

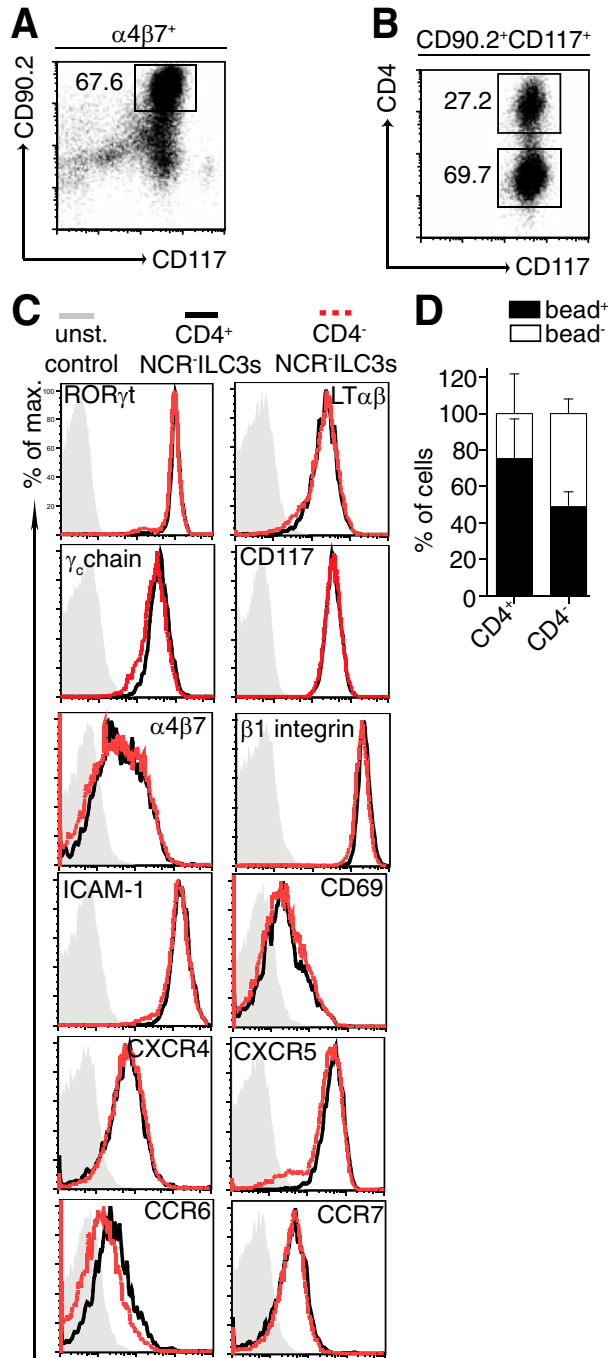

**Fig. S2.** (A and B) Phenotype of in vitro-generated NCR<sup>+</sup>ILC3s derived from  $\alpha 4\beta 7^+$  fetal liver (FL) precursors. Representative plots are shown. (C) Representative histograms of ROR $\gamma$ t, LT $\alpha\beta$ ,  $\gamma_c$  chain, CD117,  $\alpha 4\beta 7$ ,  $\beta 1$ , ICAM1, CD69, CXCR4, CXCR5, CCR6, and CCR7 expression by  $CD4^+$  and  $CD4^-$  NCR<sup>+</sup>ILC3 subsets. (D) Percentage of bead<sup>+</sup> and bead<sup>-</sup> cells within  $CD4^+$  and  $CD4^-$  NCR<sup>+</sup>ILC3s after 6 h incubation with beads (mean values  $\pm$  SD). Data shown are representative of at least three independent experiments ( $n = 3-5$ ).

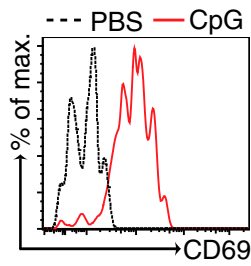

**Fig. S3.** CD69 expression of splenic NCR<sup>-</sup>ILC3s (lin<sup>-</sup>RORγt<sup>+</sup>CD117<sup>+</sup>CD4<sup>+</sup>) of WT mice 6 h after i.p. injection of CpG or PBS. Representative histogram of three independent experiments is shown.

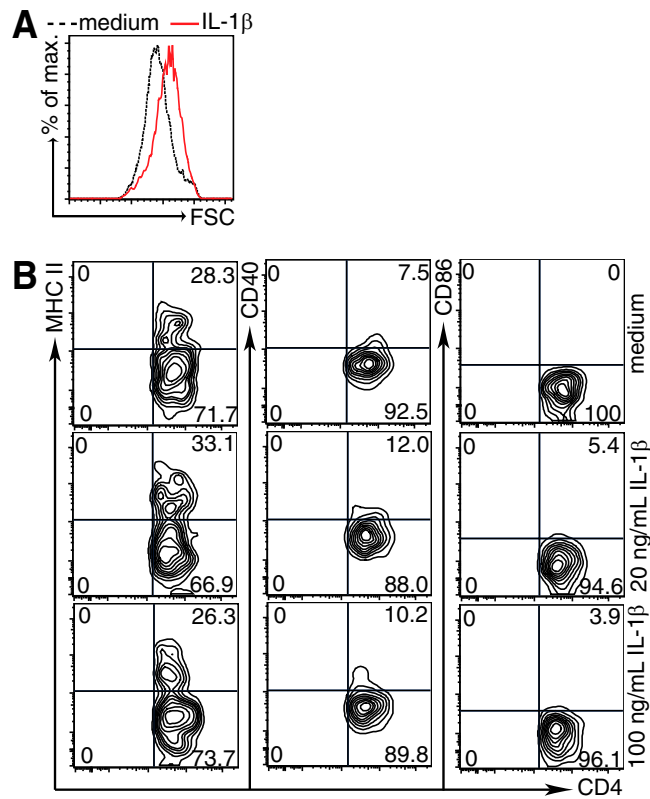

**Fig. S4.** (A) Representative histogram of forward scatter (FSC) level in lamina propria (LP) NCR<sup>-</sup>ILC3s of adult *Rag2*<sup>-/-</sup> mice cultured for 48 h in the presence of IL-1β or in medium alone. (B) Expression of MHC class II, CD40, and CD86 by LP NCR<sup>-</sup>ILC3s (lin<sup>-</sup>RORγt<sup>+</sup>CD117<sup>+</sup>CD4<sup>+</sup>) cultured for 48 h in the presence of IL-1β or in medium alone. Data are representative of four independent experiments.

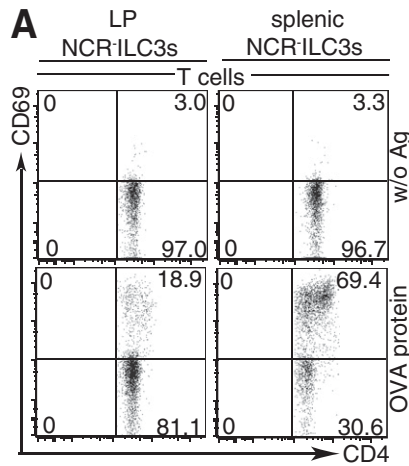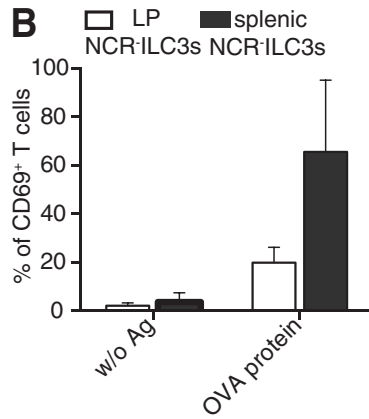

**Fig. S5.** (A) Naïve sort-purified CFSE-labeled OT-II<sup>tg</sup> CD4<sup>+</sup> T cells were cultured with IL-1β-activated splenic or LP NCR<sup>-</sup>ILC3s in the presence of ovalbumin (OVA) protein or medium alone [without antigen (Ag)]. Representative plots of CD69 expression by OT-II<sup>tg</sup> CD4<sup>+</sup> T cells 48–72 h later. Data are representative of four independent experiments. (B) Percentage of CD69<sup>+</sup> OT-II<sup>tg</sup> CD4<sup>+</sup> T cells upon coculture with IL-1β-activated splenic or LP NCR<sup>-</sup>ILC3s in the presence or absence of OVA protein. Data are shown as mean values ± SD (four independent experiments).

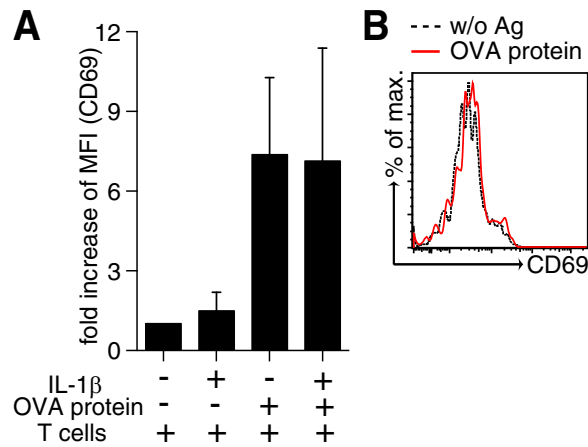

**Fig. S6.** (A) Fold increase of mean fluorescent intensity of CD69 expression by non- or IL-1β-activated (24 h) splenic NCR<sup>-</sup>ILC3s cocultured with CD4<sup>+</sup> T cells in the presence or absence of OVA protein (48–72 h) compared with nonactivated NCR<sup>-</sup>ILC3s cocultured with CD4<sup>+</sup> T cells in the absence of Ag. Data are shown as mean values ± SD (3–7 independent experiments). (B) Representative histogram of CD69 expression by nonactivated splenic NCR<sup>-</sup>ILC3s in the presence of OVA protein or in medium alone.
